# Supplementary material for: Pressure-induced phase transition in N–H⋯O hydrogen-bonded crystalline malonamide
Source: Royal Society of Chemistry journal article supplement (doi:10.1039/c7ra02205k), 2017-01-01

# Pressure-Induced Phase Transition in N–H···O Hydrogen-Bonded Crystalline Malonamide

Tingting Yan,<sup>a,\*</sup> Dongyang Xi,<sup>b</sup> Zhenning Ma,<sup>a</sup> Xun Wang,<sup>a</sup> Qingjie Wang<sup>a</sup> and Qiang Li<sup>a</sup>

<sup>a</sup> *School of Science, Shenyang Jianzhu University, Shenyang 110168, China*

<sup>b</sup> *School of Material Science and Engineering, Shenyang Jianzhu University, Shenyang 110168, China*

\*Corresponding author. Email: [yantt1120@163.com](mailto:yantt1120@163.com)

## Supporting Information

**Figure S1.** Raman spectra on compression at 0.1 GPa and decompression at 0.1 GPa, ranging from 50-3500  $\text{cm}^{-1}$ , respectively. After released, the fluorescence of malonamide enhanced significantly.

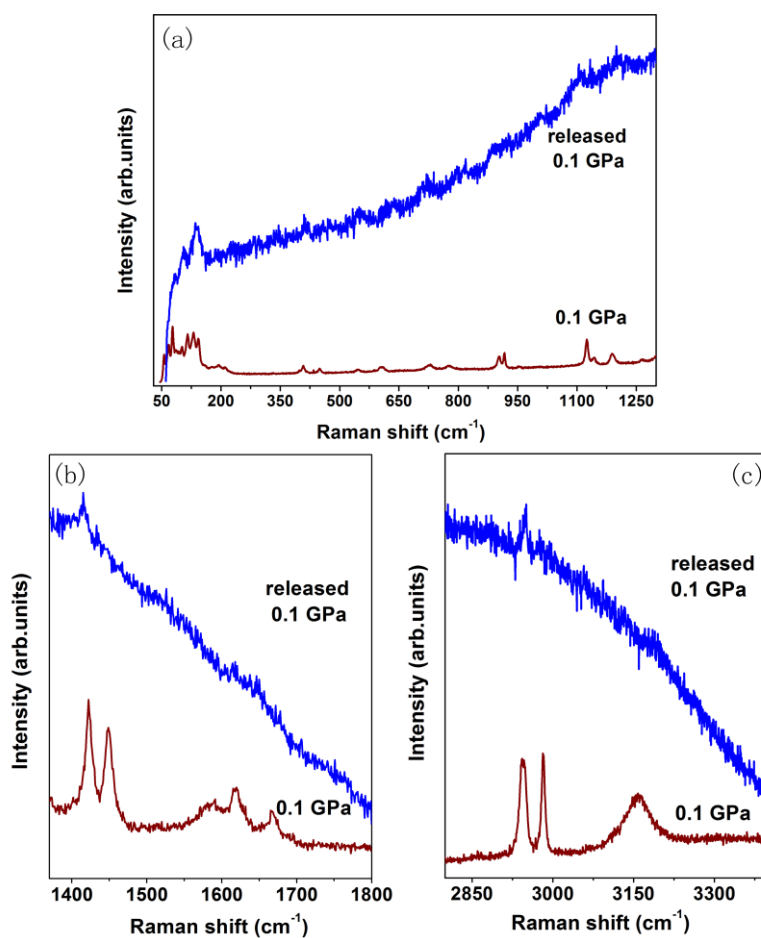

Supplement: c7ra02205k1.pdf [file c7ra02205k1.pdf]
